# Supplementary material
Source: publisher site journal article supplement (https://www.dovepress.com/article/324068)
Supplement: Supplementary file 1 [file get_supplementary_file.php]

Supplementary Table 1. Variables within NEWS, MEWS and qSOFA criteria.

|  | NEWS (Supplemental oxygen is not included) | | | | MEWS | | | | qSOFA |
| --- | --- | --- | --- | --- | --- | --- | --- | --- | --- |
| Physiological parameters | 0 | 1 | 2 | 3 | 0 | 1 | 2 | 3 | 1 |
| Respiration Rate (bpm) | 12–20 | 9–11 | 21–24 | ≥25 | 9–14 | 15–20 | <9 | ≥30 | ≥22 |
|  |  |  |  | ≤8 |  |  |  |  |  |
| Oxygen saturation (%) | ≥96 | 94–95 | 92–93 | ≤91 |  |  |  |  |  |
|  |  |  |  |  |  |  |  |  |  |
| Temperature (◦C) | 36.1–38.0 | 38.1–39.0 | ≥39.1 | ≤35.0 | 35–38.4 |  | ≥38.5 |  |  |
|  |  | 35.1–36.0 |  |  |  |  | <35 |  |  |
| Systolic blood pressure (mmHg) | 111–219 | 101–110 | 91–100 | ≥220 | 101–199 | 81–100 | 70–80 | <70 | ≤100 |
|  |  |  |  | ≤90 |  |  | ≥200 |  |  |
| Heart/pulse rate (bpm) | 51–90 | 91–110 | 111–130 | ≥131 | 51–100 | 101–110 | 111–129 | ≥130 |  |
|  |  | 41–50 |  | ≤40 |  | 40–50 | <40 |  |  |
| Level of consciousness using the AVPU system | A |  |  | V, P or U | A | V | P | U | V, P or U |

NEWS, national early warning score; MEWS, Modified Early Warning Score; qSOFA, quick sepsis-related organ failure assessment; AVPU: A, alert; V, to voice; P, to pain; U, to unresponsive; bpm, beats or breaths per minute.

Supplementary Table 2. AUC of NEWS for the prediction of outcomes in different subgroup.

| Subgroup | Emergency observation | ED mortality | Composite of ED mortality and ICU admission | In-hospital mortality |
| --- | --- | --- | --- | --- |
| Male, 29177 | | | | |
| AUC (95% CI) | 0.702 (0.697 - 0.708) | 0.854 (0.850 -0.858) | 0.863 (0.859 -0.867) | 0.788 (0.784 -0.793) |
| Optimal cutoff | >2 | >3 | >3 | >3 |
| Sensitivity (%) | 51.14 | 76.12 | 73.25 | 61.90 |
| Specificity (%) | 82.61 | 87.67 | 88.52 | 87.88 |
| PPV (%) | 31.7 | 1.4 | 9.5 | 3.6 |
| NPV (%) | 91.5 | 99.9 | 99.5 | 99.7 |
| Youden’s index | 0.34 | 0.64 | 0.62 | 0.50 |
| Female, 33226 | | | | |
| AUC (95% CI) | 0.679(0.674-0.684) | 0.874 (0.871-0.878) | 0.850 (0.846- 0.854) | 0.834 (0.830-0.838) |
| Optimal cutoff | >2 | >3 | >3 | >2 |
| Sensitivity (%) | 51.45 | 71.79 | 68.13 | 75.44 |
| Specificity (%) | 80.57 | 89.02 | 89.42 | 78.32 |
| PPV (%) | 17.9 | 0.8 | 8.3 | 1.2 |
| NPV (%) | 95.3 | 100.0 | 99.6 | 99.9 |
| Youden’s index | 0.32 | 0.61 | 0.58 | 0.54 |
| Age ≥65 year, 14391 | | | | |
| AUC (95% CI) | 0.718(0.711-0.726) | 0.864(0.858 - 0.870) | 0.845(0.839- 0.850) | 0.799(0.792-0.805) |
| Optimal cutoff | >2 | >4 | >3 | >3 |
| Sensitivity (%) | 56.69 | 72.00 | 75.00 | 65.92 |
| Specificity (%) | 78.06 | 87.27 | 82.09 | 80.86 |
| PPV (%) | 47.4 | 2.9 | 12.9 | 5.1 |
| NPV (%) | 83.8 | 99.8 | 98.9 | 99.3 |
| Youden’s index | 0.35 | 0.59 | 0.57 | 0.47 |
| Age ＜65 year, 48012 | | | | |
| AUC (95% CI) | 0.646(0.642- 0.651) | 0.800(0.796-0.804) | 0.836(0.833 -0.839) | 0.749(0.746-0.753) |
| Optimal cutoff | >2 | >3 | >3 | >3 |
| Sensitivity (%) | 44.00 | 64.52 | 64.29 | 53.47 |
| Specificity (%) | 82.29 | 90.76 | 91.02 | 90.82 |
| PPV (%) | 13.3 | 0.4 | 3.6 | 1.2 |
| NPV (%) | 96.0 | 100.0 | 99.8 | 99.9 |
| Youden’s index | 0.26 | 0.55 | 0.55 | 0.44 |
| Respiratory system, 26427 | | | | |
| AUC (95% CI) | 0.757 (0.752-0.762) | 0.899 (0.896-0.903) | 0.892 (0.888-0.896) | 0.855 (0.851 - 0.859) |
| Optimal cutoff | >3 | >3 | >3 | >3 |
| Sensitivity (%) | 55.23 | 82.86 | 80.22 | 77.60 |
| Specificity (%) | 87.11 | 83.37 | 84.16 | 83.57 |
| PPV (%) | 29.9 | 0.7 | 6.5 | 2.2 |
| NPV (%) | 95.1 | 100.0 | 99.7 | 99.9 |
| Youden’s index | 0.42 | 0.66 | 0.64 | 0.61 |

ED, emergency department; ICU, intensive care unit; PPV, positive predictive value; NPV, negative predictive value; NEWS, National Early Warning Score.
